# Supplementary figures and images for: The Nephroprotective Effect of Zizyphus lotus L. (Desf.) Fruits in a Gentamicin-Induced Acute Kidney Injury Model in Rats: A Biochemical and Histopathological Investigation
Source: MDPI journal article supplement (doi:10.3390/molecules26164806), 2021-08-08

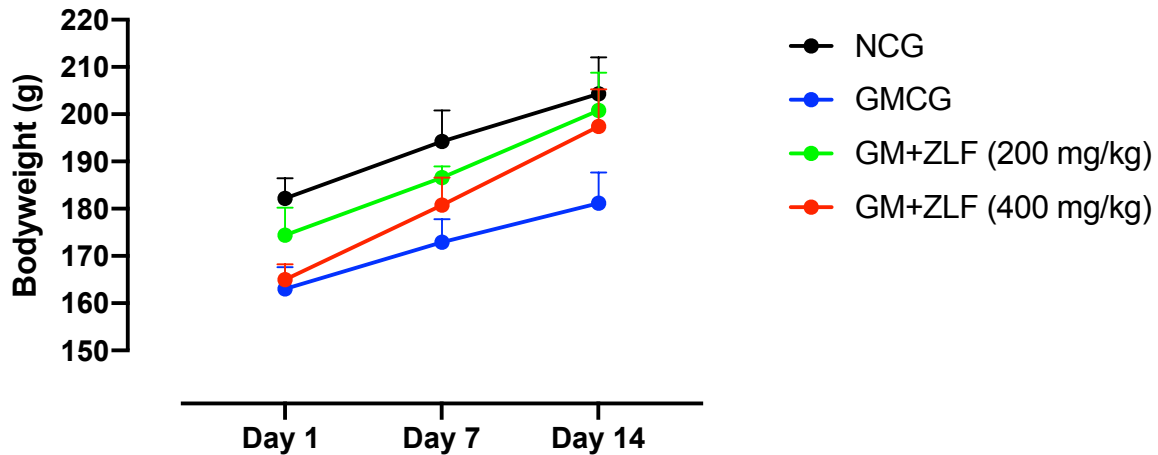

Figure S1. Bodyweight developpement during the experimental period

Supplement: s1 [file s1]
